# Supplementary material for: Assessing cancer patients’ quality of life and supportive care needs: Translation-revalidation of the CARES in Flemish and exhaustive evaluation of concurrent validity
Source: Springer Nature journal article supplement (doi:10.1186/s12913-016-1335-4), 2016-03-11
Supplement: MOESM2 [file 9758238]

# **CARES**

## **CAncer Rehabilitation Evaluation System**

Developed  
by  
C. Anne Coscarelli Schag, Ph.D.  
and  
Richard L. Heinrich, M.D.

Copyright © CARES Consultants, 1988

# CARES CAncer Rehabilitation Evaluation System

## Patient Information

Name: \_\_\_\_\_ ID #: \_\_\_\_\_

Date: \_\_\_\_\_

Age: \_\_\_\_\_

Sex:     M    F

Type of Cancer: \_\_\_\_\_

Date of Diagnosis: \_\_\_\_\_ Name of Physician: \_\_\_\_\_

## Instructions

Below is a list of Problem Statements that describe situations and experiences of individuals who have or have had cancer. Read each statement and circle the number that best describes **HOW MUCH EACH STATEMENT APPLIES TO YOU** during the **PAST MONTH, INCLUDING TODAY**. Some sections will not apply to you. Please skip these sections and proceed to the next one as directed. For any problem statement that you rate between 1 and 4, indicate whether this is a problem with which you would like help by circling Y for yes or N for no.

## Example

| How much does it apply to you?       | Not at all<br>A little<br>A fair amount<br>Much<br>Very much | Do<br>you<br>want<br>help? |
|--------------------------------------|--------------------------------------------------------------|----------------------------|
| 1. I have difficulty walking .....   | 0 ① 2 3 4                                                    | Y ①                        |
| 2. I find that food tastes bad ..... | 0 1 2 3 ④                                                    | ④ N                        |

| How much does it apply to you?                                                          | Not at all | A little | A fair amount | Much | Very much | Do you want help? |
|-----------------------------------------------------------------------------------------|------------|----------|---------------|------|-----------|-------------------|
| 1. I have difficulty bending or lifting .....                                           | 0          | 1        | 2             | 3    | 4         | Y N               |
| 2. I have difficulty walking and/or moving around .....                                 | 0          | 1        | 2             | 3    | 4         | Y N               |
| 3. I have difficulty doing physical activities such as running and playing sports ..... | 0          | 1        | 2             | 3    | 4         | Y N               |
| 4. I do not have the energy I used to .....                                             | 0          | 1        | 2             | 3    | 4         | Y N               |
| 5. I have difficulty driving .....                                                      | 0          | 1        | 2             | 3    | 4         | Y N               |
| 6. I have difficulty doing household chores .....                                       | 0          | 1        | 2             | 3    | 4         | Y N               |
| 7. I have difficulty bathing, brushing my teeth, or grooming myself .....               | 0          | 1        | 2             | 3    | 4         | Y N               |
| 8. I have difficulty preparing meals .....                                              | 0          | 1        | 2             | 3    | 4         | Y N               |
| 9. I am not interested in recreational activities like I used to be .....               | 0          | 1        | 2             | 3    | 4         | Y N               |
| 10. I do not engage in the recreational activities that I used to .....                 | 0          | 1        | 2             | 3    | 4         | Y N               |
| 11. I do not have enough enjoyable activities to fill the day .....                     | 0          | 1        | 2             | 3    | 4         | Y N               |
| 12. I have difficulty planning activities because of the cancer or its treatments ..... | 0          | 1        | 2             | 3    | 4         | Y N               |
| 13. I cannot gain weight .....                                                          | 0          | 1        | 2             | 3    | 4         | Y N               |
| 14. I am continuing to lose weight .....                                                | 0          | 1        | 2             | 3    | 4         | Y N               |
| 15. I find food unappealing .....                                                       | 0          | 1        | 2             | 3    | 4         | Y N               |
| 16. I find that food tastes bad .....                                                   | 0          | 1        | 2             | 3    | 4         | Y N               |
| 17. I find it difficult to swallow .....                                                | 0          | 1        | 2             | 3    | 4         | Y N               |
| 18. I find that the cancer or its treatments keep me from working .....                 | 0          | 1        | 2             | 3    | 4         | Y N               |
| 19. I find that cancer or its treatments interfere with my ability to work .....        | 0          | 1        | 2             | 3    | 4         | Y N               |
| 20. I frequently have pain .....                                                        | 0          | 1        | 2             | 3    | 4         | Y N               |
| 21. I have chronic pain from scars and surgery .....                                    | 0          | 1        | 2             | 3    | 4         | Y N               |
| 22. I have pain that is not controlled by pain medication .....                         | 0          | 1        | 2             | 3    | 4         | Y N               |

| How much does it apply to you?                                                                        | Not at all | A little | A fair amount | Much | Very much | Do you want help? |
|-------------------------------------------------------------------------------------------------------|------------|----------|---------------|------|-----------|-------------------|
| 23. I have pain that is controlled by pain medication .....                                           | 0          | 1        | 2             | 3    | 4         | Y N               |
| 24. I find that my clothes do not look good on me .....                                               | 0          | 1        | 2             | 3    | 4         | Y N               |
| 25. I find that my clothes do not fit .....                                                           | 0          | 1        | 2             | 3    | 4         | Y N               |
| 26. I have difficulty finding clothes to fit .....                                                    | 0          | 1        | 2             | 3    | 4         | Y N               |
| 27. I find that the medical team withholds information from me about the cancer .....                 | 0          | 1        | 2             | 3    | 4         | Y N               |
| 28. I find that doctors don't explain what they are doing to me .....                                 | 0          | 1        | 2             | 3    | 4         | Y N               |
| 29. I find that nurses don't explain what they are doing to me .....                                  | 0          | 1        | 2             | 3    | 4         | Y N               |
| 30. I have difficulty asking doctors questions .....                                                  | 0          | 1        | 2             | 3    | 4         | Y N               |
| 31. I have difficulty asking nurses questions .....                                                   | 0          | 1        | 2             | 3    | 4         | Y N               |
| 32. I have difficulty expressing my feelings to the doctors and nurses .....                          | 0          | 1        | 2             | 3    | 4         | Y N               |
| 33. I have difficulty telling my doctor about new symptoms .....                                      | 0          | 1        | 2             | 3    | 4         | Y N               |
| 34. I have difficulty understanding what the doctors tell me about the cancer or its treatments ..... | 0          | 1        | 2             | 3    | 4         | Y N               |
| 35. I have difficulty understanding what the nurses tell me about the cancer or its treatments .....  | 0          | 1        | 2             | 3    | 4         | Y N               |
| 36. I would like to have more control over what the doctors do to me .....                            | 0          | 1        | 2             | 3    | 4         | Y N               |
| 37. I would like to have more control over what the nurses do to me .....                             | 0          | 1        | 2             | 3    | 4         | Y N               |
| 38. I am embarrassed to show my body to others because of my illness .....                            | 0          | 1        | 2             | 3    | 4         | Y N               |
| 39. I am uncomfortable showing my scars to others .....                                               | 0          | 1        | 2             | 3    | 4         | Y N               |
| 40. I am uncomfortable with the changes in my body .....                                              | 0          | 1        | 2             | 3    | 4         | Y N               |
| 41. I frequently feel anxious .....                                                                   | 0          | 1        | 2             | 3    | 4         | Y N               |
| 42. I frequently feel depressed .....                                                                 | 0          | 1        | 2             | 3    | 4         | Y N               |
| 43. I frequently feel angry .....                                                                     | 0          | 1        | 2             | 3    | 4         | Y N               |

| How much does it apply to you?                                                               | Not at all | A little | A fair amount | Much | Very much | Do you want help? |
|----------------------------------------------------------------------------------------------|------------|----------|---------------|------|-----------|-------------------|
| 44. I frequently feel upset .....                                                            | 0          | 1        | 2             | 3    | 4         | Y N               |
| 45. I frequently feel overwhelmed by my emotions and feelings about the cancer .....         | 0          | 1        | 2             | 3    | 4         | Y N               |
| 46. I have difficulty sleeping .....                                                         | 0          | 1        | 2             | 3    | 4         | Y N               |
| 47. I have difficulty concentrating .....                                                    | 0          | 1        | 2             | 3    | 4         | Y N               |
| 48. I have difficulty remembering things .....                                               | 0          | 1        | 2             | 3    | 4         | Y N               |
| 49. I have difficulty thinking clearly .....                                                 | 0          | 1        | 2             | 3    | 4         | Y N               |
| 50. I have difficulty telling my friends or relatives to come over less often .....          | 0          | 1        | 2             | 3    | 4         | Y N               |
| 51. I have difficulty telling my friends or relatives to leave when I do not feel well ..... | 0          | 1        | 2             | 3    | 4         | Y N               |
| 52. I have difficulty asking my friends or relatives to do something fun with me .....       | 0          | 1        | 2             | 3    | 4         | Y N               |
| 53. I do not know what to say to my friends or relatives .....                               | 0          | 1        | 2             | 3    | 4         | Y N               |
| 54. I have difficulty asking friends or relatives to do things for me .....                  | 0          | 1        | 2             | 3    | 4         | Y N               |
| 55. I have difficulty telling my friends or relatives about the cancer .....                 | 0          | 1        | 2             | 3    | 4         | Y N               |
| 56. I have difficulty asking my friends or relatives to come over more often .....           | 0          | 1        | 2             | 3    | 4         | Y N               |
| 57. I find that my friends or relatives tell me I'm looking well when I'm not .....          | 0          | 1        | 2             | 3    | 4         | Y N               |
| 58. I find that my friends or relatives withhold information from me .....                   | 0          | 1        | 2             | 3    | 4         | Y N               |
| 59. I find that my friends or relatives avoid talking with me about the cancer .....         | 0          | 1        | 2             | 3    | 4         | Y N               |
| 60. I find that my friends or relatives do not visit often enough .....                      | 0          | 1        | 2             | 3    | 4         | Y N               |
| 61. I find that my friends or relatives do not call often enough .....                       | 0          | 1        | 2             | 3    | 4         | Y N               |

| How much does it apply to you?                                                              | Not at all<br>A little<br>A fair amount<br>Much<br>Very much | Do you want help? |
|---------------------------------------------------------------------------------------------|--------------------------------------------------------------|-------------------|
| 62. I find that my friends or relatives are uncomfortable when they visit me .....          | 0 1 2 3 4                                                    | Y N               |
| 63. I find that friends or relatives have difficulty talking with me about my illness ..... | 0 1 2 3 4                                                    | Y N               |
| 64. I feel uncomfortable when I see other patients getting treatments .....                 | 0 1 2 3 4                                                    | Y N               |
| 65. I become nervous when I have to go to the hospital .....                                | 0 1 2 3 4                                                    | Y N               |
| 66. I become nervous when I am waiting to see the doctor .....                              | 0 1 2 3 4                                                    | Y N               |
| 67. I become nervous when I am waiting to find out the results of tests .....               | 0 1 2 3 4                                                    | Y N               |
| 68. I become nervous when I am having diagnostic tests .....                                | 0 1 2 3 4                                                    | Y N               |
| 69. I become nervous when I get my blood drawn .....                                        | 0 1 2 3 4                                                    | Y N               |
| 70. I worry about whether my treatments are working .....                                   | 0 1 2 3 4                                                    | Y N               |
| 71. I worry about whether the cancer is progressing .....                                   | 0 1 2 3 4                                                    | Y N               |
| 72. I worry about not being able to care for myself .....                                   | 0 1 2 3 4                                                    | Y N               |
| 73. I worry about how my family will manage if I die .....                                  | 0 1 2 3 4                                                    | Y N               |
| 74. I do not feel sexually attractive .....                                                 | 0 1 2 3 4                                                    | Y N               |
| 75. I do not think my partner(s) finds me sexually attractive .....                         | 0 1 2 3 4                                                    | Y N               |
| 76. I am not interested in having sex .....                                                 | 0 1 2 3 4                                                    | Y N               |
| 77. I do not think that my partner(s) is interested in having sex with me .....             | 0 1 2 3 4                                                    | Y N               |
| 78. I sometimes don't show up for my doctor's appointment .....                             | 0 1 2 3 4                                                    | Y N               |
| 79. I sometimes don't show up for my treatments .....                                       | 0 1 2 3 4                                                    | Y N               |
| 80. I sometimes don't take my medication as prescribed .....                                | 0 1 2 3 4                                                    | Y N               |
| 81. I sometimes don't follow my doctor's instructions .....                                 | 0 1 2 3 4                                                    | Y N               |
| 82. I have financial problems .....                                                         | 0 1 2 3 4                                                    | Y N               |

| How much does it apply to you?                                                                                         | Not at all<br>A little<br>A fair amount<br>Much<br>Very much | Do you want help? |
|------------------------------------------------------------------------------------------------------------------------|--------------------------------------------------------------|-------------------|
| 83. I have insurance problems .....                                                                                    | 0 1 2 3 4                                                    | Y N               |
| 84. I have difficulty with transportation to and from my medical appointments and/or other places .....                | 0 1 2 3 4                                                    | Y N               |
| 85. I am gaining too much weight.....                                                                                  | 0 1 2 3 4                                                    | Y N               |
| 86. I find some diagnostic procedures extremely painful .....                                                          | 0 1 2 3 4                                                    | Y N               |
| 87. I have frequent episodes of diarrhea .....                                                                         | 0 1 2 3 4                                                    | Y N               |
| 88. I have times when I do not have control of my bladder .....                                                        | 0 1 2 3 4                                                    | Y N               |
| <b>Do you have children?</b> <span style="float: right;">Yes No</span>                                                 |                                                              |                   |
| <i>If No, skip to next section.</i>                                                                                    |                                                              |                   |
| 89. I have difficulty taking care of the children and/or the grandchildren ....                                        | 0 1 2 3 4                                                    | Y N               |
| 90. I have difficulty helping my children cope with my illness .....                                                   | 0 1 2 3 4                                                    | Y N               |
| 91. I have difficulty helping my children talk about my illness .....                                                  | 0 1 2 3 4                                                    | Y N               |
| <b>Are you working or have you been been employed during the last month?</b> <span style="float: right;">Yes No</span> |                                                              |                   |
| <i>If No, skip to next section.</i>                                                                                    |                                                              |                   |
| 92. I have difficulty talking to my boss about the cancer .....                                                        | 0 1 2 3 4                                                    | Y N               |
| 93. I have difficulty talking to the people who work with me about the cancer .....                                    | 0 1 2 3 4                                                    | Y N               |
| 94. I have difficulty telling my employer that I cannot do something because of my illness .....                       | 0 1 2 3 4                                                    | Y N               |
| 95. I have difficulty asking for time off from work for medical treatments ....                                        | 0 1 2 3 4                                                    | Y N               |
| 96. I am worried about being fired .....                                                                               | 0 1 2 3 4                                                    | Y N               |

| How much does it apply to you?                                    |                                                                                       |   |   |   | Do you want help? |          |                                     |      |           |  |  |
|-------------------------------------------------------------------|---------------------------------------------------------------------------------------|---|---|---|-------------------|----------|-------------------------------------|------|-----------|--|--|
|                                                                   |                                                                                       |   |   |   | Not at all        | A little | A fair amount                       | Much | Very much |  |  |
| <b>Did you look for work during the past month?</b>               |                                                                                       |   |   |   | <b>Yes No</b>     |          | <i>If No, skip to next section.</i> |      |           |  |  |
| 97.                                                               | I have difficulty finding a new job since I have had cancer.....                      | 0 | 1 | 2 | 3                 | 4        | Y                                   | N    |           |  |  |
| 98.                                                               | I find that employers are reluctant to hire people with a cancer history .....        | 0 | 1 | 2 | 3                 | 4        | Y                                   | N    |           |  |  |
| <b>Have you been sexually active since your cancer diagnosis?</b> |                                                                                       |   |   |   | <b>Yes No</b>     |          | <i>If No, skip to next section.</i> |      |           |  |  |
| 99.                                                               | I find that the frequency of sexual activity has decreased.....                       | 0 | 1 | 2 | 3                 | 4        | Y                                   | N    |           |  |  |
| 100.                                                              | I have difficulty becoming sexually aroused .....                                     | 0 | 1 | 2 | 3                 | 4        | Y                                   | N    |           |  |  |
| 101a.                                                             | I have difficulty getting or maintaining an erection ( <b>Males</b> ).....            | 0 | 1 | 2 | 3                 | 4        | Y                                   | N    |           |  |  |
|                                                                   | <b>b.</b> I have difficulty getting lubricated ( <b>Females</b> )                     |   |   |   |                   |          |                                     |      |           |  |  |
| 102.                                                              | I have difficulty reaching orgasm.....                                                | 0 | 1 | 2 | 3                 | 4        | Y                                   | N    |           |  |  |
| <b>Are you married or in a significant relationship?</b>          |                                                                                       |   |   |   | <b>Yes No</b>     |          | <i>If No, skip to next section.</i> |      |           |  |  |
| 103.                                                              | My partner and I have difficulty talking about our feelings .....                     | 0 | 1 | 2 | 3                 | 4        | Y                                   | N    |           |  |  |
| 104.                                                              | My partner and I have difficulty talking about our fears .....                        | 0 | 1 | 2 | 3                 | 4        | Y                                   | N    |           |  |  |
| 105.                                                              | My partner and I have difficulty talking about what will happen after my death .....  | 0 | 1 | 2 | 3                 | 4        | Y                                   | N    |           |  |  |
| 106.                                                              | My partner and I have difficulty talking about our future .....                       | 0 | 1 | 2 | 3                 | 4        | Y                                   | N    |           |  |  |
| 107.                                                              | My partner and I have difficulty talking about the cancer and what might happen ..... | 0 | 1 | 2 | 3                 | 4        | Y                                   | N    |           |  |  |



| How much does it apply to you?                                                              | Not at all | A little | A fair amount | Much | Very much | Do you want help? |
|---------------------------------------------------------------------------------------------|------------|----------|---------------|------|-----------|-------------------|
| 108. My partner and I have difficulty talking about wills and financial arrangements .....  | 0          | 1        | 2             | 3    | 4         | Y N               |
| 109. I do not feel like embracing, kissing, or caressing my partner .....                   | 0          | 1        | 2             | 3    | 4         | Y N               |
| 110. My partner does not feel like embracing, kissing or caressing me .....                 | 0          | 1        | 2             | 3    | 4         | Y N               |
| 111. I am not interested in touching my partner .....                                       | 0          | 1        | 2             | 3    | 4         | Y N               |
| 112. My partner is not interested in touching me .....                                      | 0          | 1        | 2             | 3    | 4         | Y N               |
| 113. My partner and I are not getting along as well as we usually do .....                  | 0          | 1        | 2             | 3    | 4         | Y N               |
| 114. My partner and I are upset with each other more often than usual .....                 | 0          | 1        | 2             | 3    | 4         | Y N               |
| 115. My partner and I have so much time together that we get on each other's nerves .....   | 0          | 1        | 2             | 3    | 4         | Y N               |
| 116. My partner and I are more distant than usual .....                                     | 0          | 1        | 2             | 3    | 4         | Y N               |
| 117. My partner won't let me do activities that I am capable of doing .....                 | 0          | 1        | 2             | 3    | 4         | Y N               |
| 118. My partner spends too much time taking care of me .....                                | 0          | 1        | 2             | 3    | 4         | Y N               |
| 119. My partner does not take care of me enough .....                                       | 0          | 1        | 2             | 3    | 4         | Y N               |
| 120. I have difficulty asking my partner to take care of me .....                           | 0          | 1        | 2             | 3    | 4         | Y N               |
| <b>Are you single and not in a significant relationship?                      Yes    No</b> |            |          |               |      |           |                   |
| <b><i>If No, skip to next section.</i></b>                                                  |            |          |               |      |           |                   |
| 121. I have difficulty initiating contact with potential dates .....                        | 0          | 1        | 2             | 3    | 4         | Y N               |
| 122. I have difficulty meeting potential dates .....                                        | 0          | 1        | 2             | 3    | 4         | Y N               |
| 123. I am afraid to go to places that I used to visit to meet dates .....                   | 0          | 1        | 2             | 3    | 4         | Y N               |
| 124. I have difficulty telling a date about the cancer or its treatments .....              | 0          | 1        | 2             | 3    | 4         | Y N               |
| 125. I am afraid to initiate a sexual relationship with someone .....                       | 0          | 1        | 2             | 3    | 4         | Y N               |

| How much does it apply to you?                                      |                                                                                    |   |   |   |   | Not at all<br>A little<br>A fair amount<br>Much<br>Very much |   | Do you want help? |
|---------------------------------------------------------------------|------------------------------------------------------------------------------------|---|---|---|---|--------------------------------------------------------------|---|-------------------|
| <b>Have you had chemotherapy treatments in the last month?</b>      |                                                                                    |   |   |   |   | <b>Yes No</b>                                                |   |                   |
| <i>If No, skip to next section.</i>                                 |                                                                                    |   |   |   |   |                                                              |   |                   |
| 126.                                                                | I become nervous when I get chemotherapy .....                                     | 0 | 1 | 2 | 3 | 4                                                            | Y | N                 |
| 127.                                                                | I become nauseated during and/or before chemotherapy .....                         | 0 | 1 | 2 | 3 | 4                                                            | Y | N                 |
| 128.                                                                | I vomit during and/or before chemotherapy .....                                    | 0 | 1 | 2 | 3 | 4                                                            | Y | N                 |
| 129.                                                                | I feel sick when I think about my chemotherapy .....                               | 0 | 1 | 2 | 3 | 4                                                            | Y | N                 |
| 130.                                                                | I feel nauseated after I receive chemotherapy .....                                | 0 | 1 | 2 | 3 | 4                                                            | Y | N                 |
| 131.                                                                | I vomit after chemotherapy .....                                                   | 0 | 1 | 2 | 3 | 4                                                            | Y | N                 |
| 132.                                                                | I feel tired after my chemotherapy .....                                           | 0 | 1 | 2 | 3 | 4                                                            | Y | N                 |
| 133.                                                                | I have other side effects after chemotherapy .....                                 | 0 | 1 | 2 | 3 | 4                                                            | Y | N                 |
| 134.                                                                | I have lost my hair and/or it is growing back slowly because of chemotherapy ..... | 0 | 1 | 2 | 3 | 4                                                            | Y | N                 |
| <b>Have you had radiation therapy treatments in the last month?</b> |                                                                                    |   |   |   |   | <b>Yes No</b>                                                |   |                   |
| <i>If No, skip to next section.</i>                                 |                                                                                    |   |   |   |   |                                                              |   |                   |
| 135.                                                                | I feel fatigued after my radiation treatments .....                                | 0 | 1 | 2 | 3 | 4                                                            | Y | N                 |
| 136.                                                                | I get nervous when I get radiation treatments .....                                | 0 | 1 | 2 | 3 | 4                                                            | Y | N                 |
| 137.                                                                | I feel nauseous or vomit after my radiation treatments .....                       | 0 | 1 | 2 | 3 | 4                                                            | Y | N                 |
| <b>Do you have an ostomy?</b>                                       |                                                                                    |   |   |   |   | <b>Yes No</b>                                                |   |                   |
| <i>If No, skip to next section.</i>                                 |                                                                                    |   |   |   |   |                                                              |   |                   |
| 138.                                                                | I have problems with ostomy care and maintenance .....                             | 0 | 1 | 2 | 3 | 4                                                            | Y | N                 |

How much does it apply to you?

Not at all  
A little  
A fair amount  
Much  
Very much

Do you want help?

Do you have a prosthesis?

Yes No

If No, skip to next section.

139. I have difficulty with my prosthetic device (artificial limb, breast prosthesis, etc.).....

0 1 2 3 4

Y N

Please list any additional cancer or treatment-related problems that may not have been addressed:

- A. \_\_\_\_\_
- B. \_\_\_\_\_
- C. \_\_\_\_\_
- D. \_\_\_\_\_
- E. \_\_\_\_\_
