# Supplementary material for: Assessing cancer patients’ quality of life and supportive care needs: Translation-revalidation of the CARES in Flemish and exhaustive evaluation of concurrent validity
Source: Springer Nature journal article supplement (doi:10.1186/s12913-016-1335-4), 2016-03-11
Supplement: MOESM3 [file 9758238]

# Cancer Rehabilitation Evaluation System (CARES): Patient Profile

|                                                          |                                                                                                                                                                                                                                                                    |
|----------------------------------------------------------|--------------------------------------------------------------------------------------------------------------------------------------------------------------------------------------------------------------------------------------------------------------------|
| <b>Patient Information</b><br>Name: _____<br>Date: _____ | Please Circle Normative Sample Used:<br>1. Female Breast Cancer Norm      4. Male Prostate Cancer Norm<br>2. Female Other than Breast Cancer Norm      5. Male Other than Prostate Cancer Norm<br>3. Female Combined Cancer Norm      6. Male Combined Cancer Norm |
|----------------------------------------------------------|--------------------------------------------------------------------------------------------------------------------------------------------------------------------------------------------------------------------------------------------------------------------|

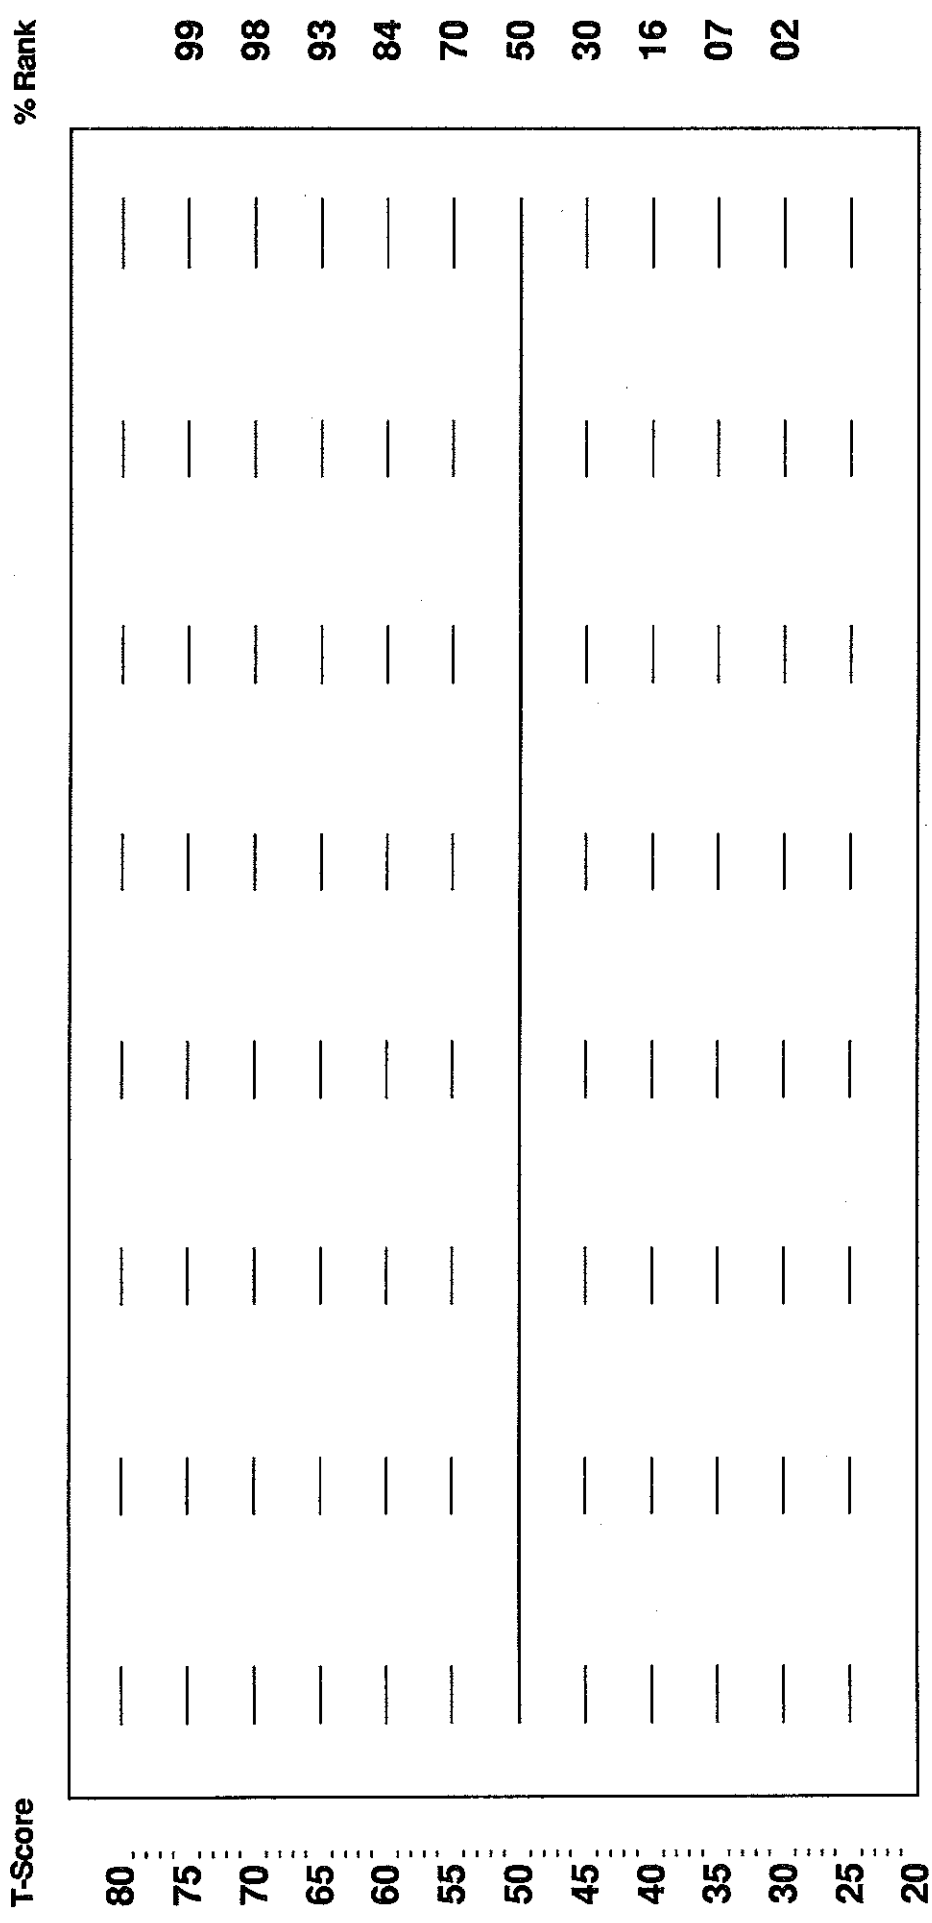

| CARES Global Score | CARES # Prob Endorsed | CARES Aver Sever | PHYSICAL Global Score | PSYCHOSOCIAL Global Score | MEDICAL INTERACTION Global Score | MARITAL Global Score | SEXUAL Global Score |
|--------------------|-----------------------|------------------|-----------------------|---------------------------|----------------------------------|----------------------|---------------------|
| T                  |                       |                  |                       |                           |                                  |                      |                     |
| Raw                |                       |                  |                       |                           |                                  |                      |                     |

**PHYSICAL**

**Ambulation**

- \_\_\_ 1. diff bend or lift
\_\_\_ 2. diff walk/move around
\_\_\_ 3. diff do physical activ.
\_\_\_ 4. reduction in energy

**Activities of Daily Living**

- \_\_\_ 5. diff driving
\_\_\_ 6. diff household chores
\_\_\_ 7. diff bathe, brush groom
\_\_\_ 8. diff prepare meals

**Recreational Activities**

- \_\_\_ 9. no interest recreat activ
\_\_\_ 10. not engage recreat activ
\_\_\_ 11. not enough enjoyable activ
\_\_\_ 12. diff planning activ

**Weight Loss**

- \_\_\_ 13. cannot gain weight
\_\_\_ 14. continue to lose weight
\_\_\_ 15. food unappealing
\_\_\_ 16. food tastes bad
\_\_\_ 17. diff swallowing

**Difficulty Working**

- \_\_\_ 18. cancer prevents work
\_\_\_ 19. cancer interferes work

**Pain**

- \_\_\_ 20. frequently has pain
\_\_\_ 21. chronic pain scars/surgery
\_\_\_ 22. pain not controlled medication
\_\_\_ 23. pain controlled medication

**Clothing**

- \_\_\_ 24. clothes not look good
\_\_\_ 25. clothes not fit
\_\_\_ 26. diff find clothes
\_\_\_ SUM \_\_\_ #(1-4) 26 # Potential

**MEDICAL INTERACTION**

**Problems Obtaining Info from Medical Team**

- \_\_\_ 27. medical team withholds info
\_\_\_ 28. doctors don't explain what do
\_\_\_ 29. nurses don't explain what do

**Difficulty Communicating with Medical Team**

- \_\_\_ 30. diff ask doctors questions
\_\_\_ 31. diff ask nurses questions
\_\_\_ 32. diff express feelings MD/RN
\_\_\_ 33. diff tell doctor new symptoms
\_\_\_ 34. diff understand MD about cancer
\_\_\_ 35. diff understand RN about cancer

**Control of Medical Team**

- \_\_\_ 36. wants more control over MD
\_\_\_ 37. wants more control over RN
\_\_\_ SUM \_\_\_ #(1-4) 11 # Potential

**\*MARITAL**

**Communication with Partner**

- \_\_\_ 103. diff talk feelings
\_\_\_ 104. diff talk fears
\_\_\_ 105. diff talk happen after death
\_\_\_ 106. diff talk future
\_\_\_ 107. diff talk cancer
\_\_\_ 108. diff talk wills/financial matters

**Affection with Partner**

- \_\_\_ 109. doesn't feel like embrace,etc
\_\_\_ 110. partner no feel like embrace, etc.
\_\_\_ 111. no interest in touch partner
\_\_\_ 112. partner no interest in touch

**Interaction with Partner**

- \_\_\_ 113. not get along as well usual
\_\_\_ 114. upset with other more often
\_\_\_ 115. so much time together, on nerves
\_\_\_ 116. more distant than usual

**Overprotection by Partner**

- \_\_\_ 117. partner not let do activ capable of
\_\_\_ 118. partner provides too much care

**Neglect of Care by Partner**

- \_\_\_ 119. partner takes too little care
\_\_\_ 120. diff ask partner to take care
\_\_\_ SUM \_\_\_ #(1-4) 18,0
# Potential Circle

**PSYCHOSOCIAL**

**Body Image**

- \_\_\_ 38. embarrassed to show body
\_\_\_ 39. uncomfor show scars
\_\_\_ 40. uncomfor with body changes

**Psychological Distress**

- \_\_\_ 41. frequently anxious
\_\_\_ 42. frequently depressed
\_\_\_ 43. frequently angry
\_\_\_ 44. frequently upset
\_\_\_ 45. frequently overwhelmed by cancer
\_\_\_ 46. diff sleep

**Cognitive Problems**

- \_\_\_ 47. diff concentrating
\_\_\_ 48. diff remembering
\_\_\_ 49. diff thinking clearly

**Difficulty Communicat with Friends/Relatives**

- \_\_\_ 50. diff tell fmd/rel to come less often
\_\_\_ 51. diff tell fmd/rel to leave when not well
\_\_\_ 52. diff ask fmd/rel to do fun things
\_\_\_ 53. don't know what to say to fmd/rel
\_\_\_ 54. diff ask fmd/rel help
\_\_\_ 55. diff tell fmd/rel about cancer
\_\_\_ 56. diff ask fmd/rel to come more

**Friends/Relatives Difficulty Interacting**

- \_\_\_ 57. fmd/rel say look well when not
\_\_\_ 58. fmd/rel withhold information
\_\_\_ 59. fmd/rel avoid talk cancer
\_\_\_ 60. fmd/rel do not visit enough
\_\_\_ 61. fmd/rel do not call enough
\_\_\_ 62. fmd/rel uncomfor visiting
\_\_\_ 63. fmd/rel diff talk about cancer

**Anxiety in Medical Situations**

- \_\_\_ 64. uncomfor see patients get treat
\_\_\_ 65. nervous going to hospital
\_\_\_ 66. nervous wait to see doctor
\_\_\_ 67. nervous wait for test results
\_\_\_ 68. nervous have diagnostic tests
\_\_\_ 69. nervous get blood drawn

**Worry**

- \_\_\_ 70. worry whether treatments work
\_\_\_ 71. worry whether cancer progress
\_\_\_ 72. worry not able to care for self
\_\_\_ 73. worry how family will manage

**\*Interaction with Children**

- \_\_\_ 89. diff care for child/grandchild
\_\_\_ 90. diff help children cope
\_\_\_ 91. diff help children talk about illness

**\*At Work Concerns**

- \_\_\_ 92. diff talk boss about cancer
\_\_\_ 93. diff talk people at work
\_\_\_ 94. diff tell employer cannot do work
\_\_\_ 95. diff ask time off for treatments
\_\_\_ 96. worried about being fired
\_\_\_ SUM \_\_\_ #(1-4) 44, 41, 39, 36
# Potential Circle

**SEXUAL**

**Sex Interest**

- \_\_\_ 74. doesn't feel sex. attract
\_\_\_ 75. thinks not sexually attractive to partner(s)
\_\_\_ 76. not interested in having sex
\_\_\_ 77. doesn't think partner(s) interested in sex

**\*Sexual Dysfunction**

- \_\_\_ 99. frequency of sex decreased
\_\_\_ 100. diff become sexually aroused
\_\_\_ 101. diff with erection (males)
\_\_\_ 101. diff lubrication (females)
\_\_\_ 102. diff reach orgasm
\_\_\_ SUM \_\_\_ #(1-4) 8, 4
# Potential Circle

\* Items may not apply to all patients

**MISCELLANEOUS**

**Compliance**

- \_\_\_ 78. doesn't show for MD appoint
\_\_\_ 79. doesn't show for treatments
\_\_\_ 80. doesn't take medication
\_\_\_ 81. doesn't follow MD's instruct
\_\_\_ SUM \_\_\_ #(1-4) 4 # Potential

**Economic Barriers**

- \_\_\_ 82. financial problems
\_\_\_ 83. insurance problems
\_\_\_ 97. diff find new job\*\*
\_\_\_ 98. employers no hire CA hist\*\*
\_\_\_ SUM \_\_\_ #(1-4) 4, 2
# Potential Circle

**\*Dating**

- \_\_\_ 121. diff initiating dates
\_\_\_ 122. diff meet dates
\_\_\_ 123. afraid go places meet dates
\_\_\_ 124. diff tell date about cancer
\_\_\_ 125. afraid to initiate sex relation
\_\_\_ SUM \_\_\_ #(1-4) 5, 0
# Potential Circle

**\*Chemotherapy-Related Problems**

- \_\_\_ 126. nervous get chemo
\_\_\_ 127. nauseated during/before chemo
\_\_\_ 128. vomit during/before chemo
\_\_\_ 129. sick when think about chemo
\_\_\_ 130. nauseated after chemo
\_\_\_ 131. vomit after chemo
\_\_\_ 132. tired after chemo
\_\_\_ 133. other side effects chemo
\_\_\_ 134. lost hair/grow slow from chemo
\_\_\_ SUM \_\_\_ #(1-4) 9, 0
# Potential Circle

**\*Radiation-Related Problems**

- \_\_\_ 135. fatigued after rad
\_\_\_ 136. nervous get rad
\_\_\_ 137. nauseous/vomit after rad
\_\_\_ SUM \_\_\_ #(1-4) 3, 0
# Potential Circle

**\*Ostomy**

- \_\_\_ 138. problems ostomy care/maint.
\_\_\_ SUM \_\_\_ #(1-4) 1, 0
# Potential Circle

**\*Prosthesis**

- \_\_\_ 139. diff with prosthesis
\_\_\_ SUM \_\_\_ #(1-4) 1, 0
# Potential Circle

**Miscellaneous Items**

- \_\_\_ 84. diff with transport
\_\_\_ 85. gain too much weight
\_\_\_ 86. diagnostic proced painful
\_\_\_ 87. frequent diarrhea
\_\_\_ 88. poor bladder control
\_\_\_ SUM \_\_\_ #(1-4) 5 # Potential

**SUM ALL 8 MISCELLANEOUS SUMS ABOVE**

\_\_\_ SUM \_\_\_ #(1-4) \_\_\_ # Potential

**Global and Average Severity for CARES and 5 Subscales**

Scale SUM # # AVE GLOBAL
Endor Poten Sever

Physical \_\_\_\_\_

Psychoso \_\_\_\_\_

Med Int \_\_\_\_\_

Marital \_\_\_\_\_

Sexual \_\_\_\_\_

Miscell \_\_\_\_\_

CARES \_\_\_\_\_
